# Supplementary material for: Imipramine Treatment Alters Sphingomyelin, Cholesterol, and Glycerophospholipid Metabolism in Isolated Macrophage Lysosomes
Source: MDPI journal article supplement (doi:10.3390/biom13121732), 2023-12-01
Supplement: s1 [file s1]

**Table S1.** Quantitation of Dounce strokes based on mean gray values of western blot protein bands. Only control lysosomes (C. Lysosomes) were analyzed for optimal Dounce stroke determination.

|                     |                     | (255 - mean gray value)         |                                  | (255 – Background)                                                  |                            | (Inv. gray value – Inv. Background) |
|---------------------|---------------------|---------------------------------|----------------------------------|---------------------------------------------------------------------|----------------------------|-------------------------------------|
| Cell lysate         | # of Dounce strokes | Mean gray value                 | Inverted gray value              | Background                                                          | Inverted Background        | Net gray value                      |
| LIMP2               | 30                  | 222.803                         | 32.197                           | 247.986                                                             | 7.014                      | 25.183                              |
|                     | 50                  | 204.347                         | 50.653                           | 247.997                                                             | 7.003                      | 43.65                               |
|                     | 70                  | 205.359                         | 49.641                           | 247.957                                                             | 7.043                      | 42.598                              |
|                     |                     |                                 |                                  |                                                                     |                            |                                     |
| Calreticulin (Cal.) | 30                  | 247.425                         | 7.575                            | 248                                                                 | 7                          | 0.575                               |
|                     | 50                  | 247.114                         | 7.886                            | 248                                                                 | 7                          | 0.886                               |
|                     | 70                  | 247.407                         | 7.593                            | 248                                                                 | 7                          | 0.593                               |
| C. Lysosomes        |                     |                                 |                                  |                                                                     |                            |                                     |
| LIMP2               | 30                  | 190.433                         | 64.567                           | 248                                                                 | 7                          | 57.567                              |
|                     | 50                  | 135.735                         | 119.265                          | 247.949                                                             | 7.051                      | 112.214                             |
|                     | 70                  | 135.098                         | 119.902                          | 248                                                                 | 7                          | 112.902                             |
|                     |                     |                                 |                                  |                                                                     |                            |                                     |
| Calreticulin (Cal.) | 30                  | 248                             | 7                                | 248                                                                 | 7                          | 0.067                               |
|                     | 50                  | 247.93                          | 7.07                             | 247.943                                                             | 7.057                      | 0.12                                |
|                     | 70                  | 247.906                         | 7.094                            | 248                                                                 | 7                          | 0.094                               |
|                     |                     |                                 |                                  |                                                                     |                            |                                     |
|                     |                     | Cell lysate: Net LIMP2/Net Cal. | C. Lysosomes: Net LIMP2/Net Cal. | Cell lysate: (Net LIMP2/Net Cal.) / Lysosomes: (Net LIMP2/Net Cal.) | <b>Approx. Fold-purity</b> |                                     |
|                     | 30                  | 43.80                           | 859.21                           | 19.62                                                               | <b>~20</b>                 |                                     |
|                     | 50                  | 49.27                           | 935.12                           | 18.98                                                               | <b>~19</b>                 |                                     |
|                     | 70                  | 71.83                           | 1201.09                          | 16.72                                                               | <b>~17</b>                 |                                     |
