# Supplementary material for: Imipramine Treatment Alters Sphingomyelin, Cholesterol, and Glycerophospholipid Metabolism in Isolated Macrophage Lysosomes
Source: MDPI journal article supplement (doi:10.3390/biom13121732), 2023-12-01

**Figure S2.** Photograph illustrating similarity in band sedimentation between lysosomes isolated from control and imipramine-treated mexAM.

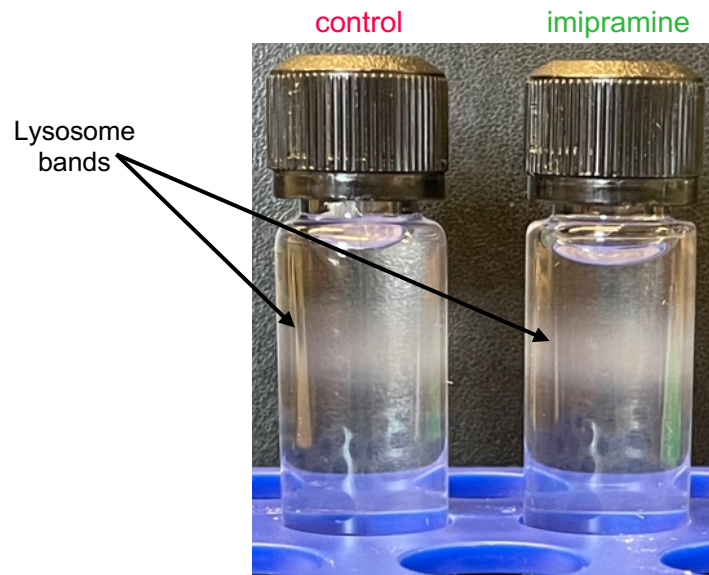

Supplement: s1 [file s1]
