# Supplementary material for: Imipramine Treatment Alters Sphingomyelin, Cholesterol, and Glycerophospholipid Metabolism in Isolated Macrophage Lysosomes
Source: MDPI journal article supplement (doi:10.3390/biom13121732), 2023-12-01
Supplement: s1 [file s1]

**Table S4.** Absolute intensities of lipid species corresponding to Figure 4.

| Lipid name                              | MRM                    | <u>Control 1</u><br>(Absolute intensity) | <u>Control 2</u><br>(Absolute intensity) | <u>Control 3</u><br>(Absolute intensity) | <u>IMP 1</u><br>(Absolute intensity) | <u>IMP 2</u><br>(Absolute intensity) | <u>IMP 3</u><br>(Absolute intensity) |
|-----------------------------------------|------------------------|------------------------------------------|------------------------------------------|------------------------------------------|--------------------------------------|--------------------------------------|--------------------------------------|
| <b>CE(18:1)</b>                         | 668.634574<br>-> 369.2 | 6830.860451                              | 7157.360493                              | 8327.700630                              | 7831.400547                          | 33301.442230                         | 41471.562780                         |
| <b>CE(18:2)</b>                         | 666.618874<br>-> 369.2 | 6653.840473                              | 6703.180458                              | 7340.720520                              | 6707.500477                          | 19283.641320                         | 26049.321860                         |
| <b>CE(19:0)</b>                         | 684.665874<br>-> 369.2 | 9171.520645                              | 14913.481060                             | 7337.640518                              | 7145.340511                          | 7315.320534                          | 10141.240730                         |
| <b>CE(20:4)</b>                         | 690.618874<br>-> 369.2 | 6063.560429                              | 6773.480488                              | 6826.560482                              | 7045.000488                          | 23232.761680                         | 31361.302160                         |
| <b>SM(d16:1/18:1)</b>                   | 701.559725<br>-> 184.1 | 1464.580097                              | 10247.22080                              | 12521.940930                             | 14734.901210                         | 21823.301440                         | 29129.082440                         |
| <b>SM(d16:1/18:0)</b>                   | 703.575425<br>-> 184.1 | 4867.000328                              | 1371124.438000                           | 1396877.680000                           | 1796360.898000                       | 1776514.799000                       | 2008372.914000                       |
| <b>SM(d18:1/17:0)</b>                   | 717.591025<br>-> 184.1 | 1289.940083                              | 13480.881040                             | 14787.741180                             | 16952.641140                         | 23542.022100                         | 26981.862060                         |
| <b>SM(d18:0/17:0)</b>                   | 719.606725<br>-> 184.1 | 1307.780090                              | 42615.062880                             | 52916.483590                             | 66934.124910                         | 63602.444900                         | 65060.585010                         |
| <b>SM(d18:2/18:1)</b>                   | 727.575425<br>-> 184.1 | 1214.260086                              | 1489.120098                              | 1353.220089                              | 1556.900101                          | 1459.500107                          | 1640.140102                          |
| <b>SM(d16:1/20:1)</b>                   | 729.591025<br>-> 184.1 | 1344.200089                              | 5367.420334                              | 7211.060627                              | 7783.560635                          | 11418.420960                         | 12305.221070                         |
| <b>SM(d18:1/19:0)</b>                   | 745.622325<br>-> 184.1 | 1213.460083                              | 32904.043000                             | 38440.882690                             | 49526.443980                         | 79662.944160                         | 93570.026570                         |
| <b>SM(d16:1/22:1)</b>                   | 757.622325<br>-> 184.1 | 1193.720085                              | 7785.720524                              | 9371.960564                              | 12874.100980                         | 14552.740790                         | 16917.741370                         |
| <b>SM(d16:0/23:0)</b>                   | 775.669325<br>-> 184.1 | 1291.740086                              | 11350.780900                             | 14847.580940                             | 19854.541450                         | 24651.722290                         | 27513.222450                         |
| <b>SM(d18:2/22:1)</b>                   | 783.638025<br>-> 184.1 | 1542.780113                              | 20505.401600                             | 24097.421540                             | 31480.022240                         | 35775.10213                          | 44716.783700                         |
| <b>SM(d17:1/26:1)</b>                   | 827.700625<br>-> 184.1 | 1298.220081                              | 4306.360298                              | 5205.220360                              | 5928.900452                          | 7425.560570                          | 8488.160549                          |
| <b>SM(d18:0/26:1(17Z))</b>              | 843.731925<br>-> 184.1 | 1278.740089                              | 4478.760372                              | 5913.7004810                             | 7758.620518                          | 6814.860565                          | 6937.400383                          |
| <b>Cer(d18:1/18:0)</b>                  | 566.551225<br>-> 264.4 | 1198.560078                              | 1212.500088                              | 1306.700096                              | 1537.120110                          | 1420.980110                          | 1385.640095                          |
| <b>1-O-carboceroyl-Cer(d18:1/18:0)</b>  | 972.968725<br>-> 264.4 | 1207.700096                              | 1216.220081                              | 1300.940102                              | 1291.100086                          | 1269.480087                          | 1246.900089                          |
| <b>LPC(16:0),PC(O-16:0),LPC(O-17:0)</b> | 496.376725<br>-> 184.1 | 5063.100388                              | 33468.762810                             | 53341.825150                             | 66805.843880                         | 43126.262580                         | 56487.54402                          |
| <b>LPC(18:1),PC(O-18:1),PC(P-18:0)</b>  | 522.355925<br>-> 184.1 | 4538.940273                              | 18710.381240                             | 29012.101960                             | 38481.062870                         | 42502.903020                         | 54607.904000                         |
| <b>PC(26:0)</b>                         | 650.476125<br>-> 184.1 | 2299.460144                              | 6867.500481                              | 8788.080772                              | 10553.360780                         | 7076.960648                          | 11280.400760                         |
| <b>PC(31:2),PC(O-32:2),PC(P-32:1)</b>   | 716.559425<br>-> 184.1 | 3153.320232                              | 10372.120650                             | 17170.401250                             | 25499.181960                         | 39460.942100                         | 43898.542830                         |
| <b>PC(32:1),PC(O-33:1),PC(P-33:0)</b>   | 732.590725<br>-> 184.1 | 74442.22596                              | 534230.307600                            | 819368.686000                            | 1109316.675000                       | 944867.449400                        | 1160590.597000                       |
| <b>PC(32:0),PC(O-33:0)</b>              | 734.606325<br>-> 184.1 | 21482.94151                              | 93741.967210                             | 134411.229800                            | 183928.053900                        | 142909.850600                        | 191096.634000                        |
| <b>PC(33:3),PC(O-34:3),PC(P-34:2)</b>   | 742.575025<br>-> 184.1 | 1418.820099                              | 6739.440453                              | 11166.780790                             | 13432.860800                         | 24841.461690                         | 29709.802400                         |
| <b>PC(33:2),PC(O-34:2),PC(P-34:1)</b>   | 744.590725<br>-> 184.1 | 9586.580612                              | 71789.664540                             | 120475.849300                            | 164934.870300                        | 223738.133500                        | 279583.861100                        |
| <b>PC(35:5),PC(O-36:5),PC(P-36:4)</b>   | 766.575025<br>-> 184.1 | 2361.340153                              | 10795.020800                             | 15297.661420                             | 20008.121140                         | 30880.942320                         | 36428.821700                         |
| <b>PC(35:4),PC(O-36:4),PC(P-36:3)</b>   | 768.590725<br>-> 184.1 | 3152.400230                              | 16303.681110                             | 24966.822070                             | 35131.982440                         | 37055.402280                         | 46095.822910                         |

|                                         |                        |             |              |               |               |               |               |
|-----------------------------------------|------------------------|-------------|--------------|---------------|---------------|---------------|---------------|
| PC(35:3),PC(O-36:3),PC(P-36:2)          | 770.606325<br>-> 184.1 | 3424.260216 | 18438.121360 | 28936.302270  | 41994.483220  | 48309.123030  | 60234.824780  |
| PC(36:8),PC(35:1),PC(O-36:1),PC(P-36:0) | 774.637625<br>-> 184.1 | 5811.780411 | 30028.681560 | 48968.323060  | 70395.504750  | 67747.085780  | 89745.126740  |
| PC(36:4),PC(O-37:4)                     | 782.606325<br>-> 184.1 | 8782.440590 | 42878.704040 | 69208.003910  | 93437.026790  | 93623.345550  | 133797.308200 |
| PC(36:3),PC(P-37:2)                     | 784.622025<br>-> 184.1 | 8593.440643 | 67960.885370 | 111045.267400 | 161105.633200 | 177886.433900 | 224359.733400 |
| PC(37:3),PC(O-38:3),PC(P-38:2)          | 798.637625<br>-> 184.1 | 1657.880127 | 4454.680305  | 6336.380356   | 8784.200638   | 10161.640790  | 14625.500760  |
| PC(38:7),PC(37:0),PC(O-38:0)            | 804.684625<br>-> 184.1 | 2047.580128 | 5886.760441  | 9765.520863   | 13705.381070  | 10757.740720  | 14622.600780  |
| PC(38:5)                                | 808.585625<br>-> 184.1 | 6339.420425 | 30925.662440 | 51687.664270  | 71884.423890  | 88023.027180  | 120618.092300 |
| PC(38:4)                                | 810.601325<br>-> 184.1 | 7284.400452 | 26153.682170 | 32721.462400  | 45851.684040  | 65444.084560  | 84667.445720  |
| PC(38:3)                                | 812.616925<br>-> 184.1 | 3803.660301 | 14359.860980 | 28004.941600  | 37130.322920  | 44656.943100  | 62882.864490  |
| PC(39:5),PC(O-40:5),PC(P-40:4)          | 822.637625<br>-> 184.1 | 1699.100124 | 5436.120350  | 8219.400612   | 12412.840810  | 13423.021100  | 17295.821150  |
| PC(39:4),PC(O-40:4),PC(P-40:3)          | 824.653325<br>-> 184.1 | 1284.360085 | 2529.460178  | 4184.300335   | 5301.620354   | 5872.740372   | 7210.760460   |
| PC(40:7),PC(39:0),PC(O-40:0)            | 832.715925<br>-> 184.1 | 2701.080189 | 12581.581050 | 20911.281720  | 28810.161680  | 27633.081830  | 38619.182510  |
| PC(40:6)                                | 834.601325<br>-> 184.1 | 2870.380184 | 9446.420692  | 15675.081000  | 20163.641510  | 23745.261380  | 33690.962210  |
| PC(40:5)                                | 836.616925<br>-> 184.1 | 1498.940102 | 5998.440441  | 8670.280579   | 12740.000700  | 17543.321430  | 22813.141870  |
| PC(40:2)                                | 842.663925<br>-> 184.1 | 1401.180115 | 3892.340233  | 6348.240482   | 7645.820541   | 6305.320496   | 8703.680588   |
