# Supplementary material for: Imipramine Treatment Alters Sphingomyelin, Cholesterol, and Glycerophospholipid Metabolism in Isolated Macrophage Lysosomes
Source: MDPI journal article supplement (doi:10.3390/biom13121732), 2023-12-01
Supplement: s1 [file s1]

**Table S3.** Lipid species fold-change data corresponding to Figure 4.

| Lipid name                         | MRM                     | <u>Control</u><br><u>1 (fold-</u><br><u>change)</u> | <u>Control</u><br><u>2 (fold-</u><br><u>change)</u> | <u>Control</u><br><u>3 (fold-</u><br><u>change)</u> | <u>IMP 1</u><br><u>(fold-</u><br><u>change)</u> | <u>IMP 2</u><br><u>(fold-</u><br><u>change)</u> | <u>IMP 3</u><br><u>(fold-</u><br><u>change)</u> | <u>IMP/Cont</u><br><u>rol (avg</u><br><u>fold-</u><br><u>change)</u> | <u>p-</u><br><u>value</u> |
|------------------------------------|-------------------------|-----------------------------------------------------|-----------------------------------------------------|-----------------------------------------------------|-------------------------------------------------|-------------------------------------------------|-------------------------------------------------|----------------------------------------------------------------------|---------------------------|
| CE(18:1)                           | 668.634574 -<br>> 369.2 | 0.720067<br>99                                      | 1.156640<br>77                                      | 1.12329<br>124                                      | 2.712210<br>34                                  | 2.725660<br>66                                  | 2.98880<br>708                                  | 2.8088926<br>9                                                       | 0.0004<br>0935            |
| CE(20:4)                           | 690.618874 -<br>> 369.2 | 0.774346<br>39                                      | 1.077402<br>84                                      | 1.14825<br>077                                      | 2.150126<br>17                                  | 2.342169<br>13                                  | 2.21704<br>916                                  | 2.2364481<br>5                                                       | 0.0006<br>3734            |
| CE(18:2)                           | 666.618874 -<br>> 369.2 | 0.761713<br>44                                      | 1.151601<br>38                                      | 1.08668<br>518                                      | 1.773942<br>2                                   | 1.933783<br>73                                  | 2.11635<br>099                                  | 1.9413589<br>7                                                       | 0.0038<br>0066            |
| PC(33:3),PC(O-<br>34:3),PC(P-34:2) | 742.575025 -<br>> 184.1 | 1.013113<br>88                                      | 1.063976<br>92                                      | 0.92290<br>921                                      | 1.849383<br>02                                  | 1.737451<br>44                                  | 1.58629<br>201                                  | 1.7243754<br>9                                                       | 0.0011<br>2065            |
| PC(31:2),PC(O-<br>32:2),PC(P-32:1) | 716.559425 -<br>> 184.1 | 0.945517<br>19                                      | 0.992092<br>36                                      | 1.06239<br>045                                      | 1.781495<br>03                                  | 1.556791<br>54                                  | 1.69813<br>691                                  | 1.6788078<br>3                                                       | 0.0007<br>7844            |
| SM(d18:1/19:0)                     | 745.622325 -<br>> 184.1 | 0.979059<br>81                                      | 0.997927<br>49                                      | 1.02301<br>27                                       | 1.523807<br>43                                  | 1.533708<br>58                                  | 1.56885<br>03                                   | 1.5421221                                                            | 8.3862<br>E-06            |
| PC(35:5),PC(O-<br>36:5),PC(P-36:4) | 766.575025 -<br>> 184.1 | 1.092774<br>9                                       | 0.981526<br>57                                      | 0.92569<br>853                                      | 1.548150<br>1                                   | 1.434600<br>04                                  | 1.54005<br>701                                  | 1.5076023<br>8                                                       | 0.0011<br>5601            |
| PC(40:5)                           | 836.616925 -<br>> 184.1 | 1.039194<br>79                                      | 0.952053<br>93                                      | 1.00875<br>128                                      | 1.505170<br>59                                  | 1.537525<br>04                                  | 1.47223<br>217                                  | 1.5049759<br>3                                                       | 9.1193<br>E-05            |
| PC(33:2),PC(O-<br>34:2),PC(P-34:1) | 744.590725 -<br>> 184.1 | 0.963479<br>58                                      | 1.024826<br>57                                      | 1.01169<br>385                                      | 1.487085<br>35                                  | 1.459725<br>43                                  | 1.45429<br>226                                  | 1.4670343<br>5                                                       | 2.5277<br>E-05            |
| SM(d16:1/18:1)                     | 701.559725 -<br>> 184.1 | 0.979000<br>5                                       | 1.043744<br>36                                      | 0.97725<br>514                                      | 1.340327<br>85                                  | 1.533026<br>83                                  | 1.42890<br>15                                   | 1.4340853<br>9                                                       | 0.0019<br>1631            |
| PC(38:4)                           | 810.601325 -<br>> 184.1 | 1.156397<br>87                                      | 0.917016<br>05                                      | 0.92658<br>608                                      | 1.433046<br>01                                  | 1.456362<br>16                                  | 1.35484<br>984                                  | 1.4147526<br>7                                                       | 0.0078<br>4838            |
| PC(38:5)                           | 808.585625 -<br>> 184.1 | 0.961013<br>01                                      | 1.018044<br>95                                      | 1.02094<br>205                                      | 1.354633<br>62                                  | 1.458146<br>63                                  | 1.35002<br>193                                  | 1.3876007<br>3                                                       | 0.0006<br>5537            |
| PC(38:3)                           | 812.616925 -<br>> 184.1 | 0.877738<br>1                                       | 1.084973<br>61                                      | 1.03728<br>83                                       | 1.351820<br>41                                  | 1.495290<br>3                                   | 1.25497<br>156                                  | 1.3673607<br>6                                                       | 0.0173<br>0358            |
| PC(40:6)                           | 834.601325 -<br>> 184.1 | 0.990976<br>21                                      | 1.042258<br>71                                      | 0.96676<br>508                                      | 1.233639<br>3                                   | 1.374952<br>99                                  | 1.30772<br>594                                  | 1.3054394<br>1                                                       | 0.0027<br>7591            |
| PC(36:3),PC(P-37:2)                | 784.622025 -<br>> 184.1 | 0.961818<br>4                                       | 0.996102<br>19                                      | 1.04207<br>941                                      | 1.246786<br>74                                  | 1.235257<br>37                                  | 1.37904<br>695                                  | 1.2870303<br>5                                                       | 0.0051<br>3517            |
| PC(37:3),PC(O-<br>38:3),PC(P-38:2) | 798.637625 -<br>> 184.1 | 1.070357<br>31                                      | 0.964991<br>01                                      | 0.96465<br>168                                      | 1.209181<br>16                                  | 1.367103<br>74                                  | 1.27481<br>124                                  | 1.2836987<br>1                                                       | 0.0079<br>7417            |
| PC(35:3),PC(O-<br>36:3),PC(P-36:2) | 770.606325 -<br>> 184.1 | 0.988251<br>85                                      | 0.983023<br>25                                      | 1.02872<br>489                                      | 1.282317<br>05                                  | 1.255963<br>76                                  | 1.24891<br>61                                   | 1.2623989<br>7                                                       | 0.0001<br>1947            |
| SM(d18:1/17:0)                     | 717.591025 -<br>> 184.1 | 1.060064<br>85                                      | 1.014522<br>47                                      | 0.92541<br>268                                      | 1.190067<br>77                                  | 1.168778<br>48                                  | 1.38063<br>342                                  | 1.2464932<br>2                                                       | 0.0343<br>1338            |
| SM(d16:0/23:0)                     | 775.669325 -<br>> 184.1 | 0.894050<br>75                                      | 1.020323<br>31                                      | 1.08562<br>594                                      | 1.248238<br>21                                  | 1.193779<br>25                                  | 1.21113<br>411                                  | 1.2177171<br>9                                                       | 0.0204<br>1981            |
| SM(d16:1/20:1)                     | 729.591025 -<br>> 184.1 | 0.943743<br>08                                      | 1.106198<br>31                                      | 0.95005<br>862                                      | 1.290648<br>54                                  | 1.191855<br>82                                  | 1.16955<br>43                                   | 1.2173528<br>9                                                       | 0.0285<br>4508            |
| PC(39:5),PC(O-<br>40:5),PC(P-40:4) | 822.637625 -<br>> 184.1 | 0.999349<br>55                                      | 0.957719<br>43                                      | 1.04293<br>102                                      | 1.222063<br>93                                  | 1.236938<br>29                                  | 1.12760<br>117                                  | 1.1955344<br>6                                                       | 0.0097<br>4822            |
| SM(d16:1/22:1)                     | 757.622325 -<br>> 184.1 | 0.938054<br>79                                      | 0.985157<br>17                                      | 1.07678<br>804                                      | 1.127166<br>21                                  | 1.122840<br>09                                  | 1.21413<br>84                                   | 1.1547149                                                            | 0.0373<br>7217            |

|                                         |                         |                |                |                |                |                |                |                |                |
|-----------------------------------------|-------------------------|----------------|----------------|----------------|----------------|----------------|----------------|----------------|----------------|
| SM(d18:2/22:1)                          | 783.638025 -<br>> 184.1 | 0.970549<br>81 | 0.995097<br>87 | 1.03435<br>233 | 1.088539<br>52 | 1.165913<br>25 | 1.20889<br>373 | 1.1544488<br>3 | 0.0178<br>5316 |
| PC(39:4),PC(O-40:4),PC(P-40:3)          | 824.653325 -<br>> 184.1 | 0.997861<br>94 | 1.046249<br>47 | 0.95588<br>859 | 1.147357<br>37 | 1.106629<br>31 | 1.18484<br>186 | 1.1462761<br>8 | 0.0132<br>9072 |
| PC(36:4),PC(O-37:4)                     | 782.606325 -<br>> 184.1 | 0.993719<br>26 | 1.016595<br>47 | 0.98968<br>527 | 1.074537<br>33 | 1.206279<br>42 | 1.13058<br>44  | 1.1371337<br>2 | 0.0246<br>9352 |
| PC(35:4),PC(O-36:4),PC(P-36:3)          | 768.590725 -<br>> 184.1 | 1.015066<br>11 | 0.985239<br>27 | 0.99969<br>462 | 1.142550<br>71 | 1.116474<br>27 | 1.14623<br>759 | 1.1350875<br>2 | 0.0004<br>4561 |
| LPC(18:1),PC(O-18:1),PC(P-18:0)         | 522.355925 -<br>> 184.1 | 1.026417<br>69 | 1.008766<br>1  | 0.96481<br>621 | 1.154716<br>53 | 1.165401<br>27 | 1.07923<br>872 | 1.1331188<br>4 | 0.0152<br>4558 |
| PC(36:8),PC(35:1),PC(O-36:1),PC(P-36:0) | 774.637625 -<br>> 184.1 | 0.966176<br>32 | 0.998631<br>24 | 1.03519<br>244 | 1.079508<br>43 | 1.123335<br>51 | 1.15670<br>198 | 1.1198486<br>4 | 0.0161<br>0865 |
| PC(40:7),PC(39:0),PC(O-40:0)            | 832.715925 -<br>> 184.1 | 0.967736<br>04 | 1.019464<br>57 | 1.01279<br>939 | 1.052607<br>14 | 1.155588<br>63 | 1.11405<br>409 | 1.1074166<br>2 | 0.0343<br>2882 |
| SM(d17:1/26:1)                          | 827.700625 -<br>> 184.1 | 0.996570<br>1  | 1.050950<br>55 | 0.95247<br>934 | 1.104690<br>22 | 1.082074<br>61 | 1.12972<br>039 | 1.1054950<br>7 | 0.0289<br>5684 |
| PC(38:7),PC(37:0),PC(O-38:0)            | 804.684625 -<br>> 184.1 | 0.962920<br>51 | 1.012463<br>27 | 1.02461<br>622 | 0.871465<br>99 | 0.930501<br>73 | 0.86480<br>013 | 0.8889226<br>2 | 0.0168<br>5875 |
| SM(d16:1/18:0)                          | 703.575425 -<br>> 184.1 | 1.072063       | 0.952900<br>35 | 0.97503<br>666 | 0.892947<br>73 | 0.865035<br>48 | 0.87366<br>769 | 0.8772169<br>7 | 0.0306<br>9839 |
| PC(32:1),PC(O-33:1),PC(P-33:0)          | 732.590725 -<br>> 184.1 | 1.026989<br>81 | 0.998359<br>06 | 0.97465<br>113 | 0.899546<br>86 | 0.867950<br>88 | 0.85940<br>049 | 0.8756327<br>4 | 0.0030<br>6691 |
| SM(d18:0/17:0)                          | 719.606725 -<br>> 184.1 | 0.945263<br>59 | 1.024062<br>46 | 1.03067<br>396 | 0.906937<br>54 | 0.794975<br>77 | 0.89299<br>364 | 0.8649689<br>8 | 0.0390<br>0167 |
| PC(40:2)                                | 842.663925 -<br>> 184.1 | 1.023359<br>45 | 1.057890<br>14 | 0.91875<br>041 | 0.820993<br>78 | 0.890223<br>06 | 0.83424<br>103 | 0.8484859<br>6 | 0.0319<br>6359 |
| PC(32:0),PC(O-33:0)                     | 734.606325 -<br>> 184.1 | 1.069307<br>81 | 0.971793<br>57 | 0.95889<br>862 | 0.807320<br>79 | 0.848008<br>49 | 0.85166<br>079 | 0.8356633<br>6 | 0.0120<br>0429 |
| SM(d18:0/26:1(17Z))                     | 843.731925 -<br>> 184.1 | 0.894305<br>98 | 1.030227<br>89 | 1.07546<br>612 | 0.874780<br>42 | 0.763081<br>98 | 0.76019<br>723 | 0.7993532<br>1 | 0.0387<br>9712 |
| 1-O-carboceroyl-Cer(d18:1/18:0)         | 972.968725 -<br>> 264.4 | 1.123522<br>4  | 1.048509<br>91 | 0.82796<br>769 | 0.753892<br>17 | 0.634522<br>98 | 0.76909<br>428 | 0.7191698<br>1 | 0.0461<br>8034 |
| Cer(d18:1/18:0)                         | 566.551225 -<br>> 264.4 | 1.063717<br>52 | 1.000152<br>28 | 0.93613<br>02  | 0.801394<br>4  | 0.669639<br>57 | 0.67323<br>861 | 0.7147575<br>3 | 0.0074<br>075  |
| SM(d18:2/18:1)                          | 727.575425 -<br>> 184.1 | 1.191121<br>63 | 0.944366<br>33 | 0.86451<br>204 | 0.750488<br>93 | 0.722692<br>36 | 0.61613<br>29  | 0.6964380<br>6 | 0.0463<br>6557 |
| PC(26:0)                                | 650.476125 -<br>> 184.1 | 1.193590<br>96 | 0.968100<br>97 | 0.83830<br>807 | 0.609142<br>5  | 0.762710<br>7  | 0.64676<br>864 | 0.6728739<br>5 | 0.0450<br>4951 |
| LPC(16:0),PC(O-16:0),LPC(O-17:0)        | 496.376725 -<br>> 184.1 | 1.026531<br>09 | 1.036979<br>35 | 0.93648<br>956 | 0.655072<br>8  | 0.674005<br>79 | 0.68119<br>416 | 0.6700909<br>2 | 0.0005<br>5183 |
| CE(19:0)                                | 684.665874 -<br>> 369.2 | 1.269928<br>27 | 0.862599<br>84 | 0.86747<br>19  | 0.504281<br>73 | 0.564146<br>67 | 0.48931<br>527 | 0.5192478<br>9 | 0.0246<br>3047 |
