# Supplementary material for: Imipramine Treatment Alters Sphingomyelin, Cholesterol, and Glycerophospholipid Metabolism in Isolated Macrophage Lysosomes
Source: MDPI journal article supplement (doi:10.3390/biom13121732), 2023-12-01

**Supplemental Figure S4.** Representative VV and VH fits for time-resolved anisotropy measurements of Di-4ANEPPDHQ in lysosomes.

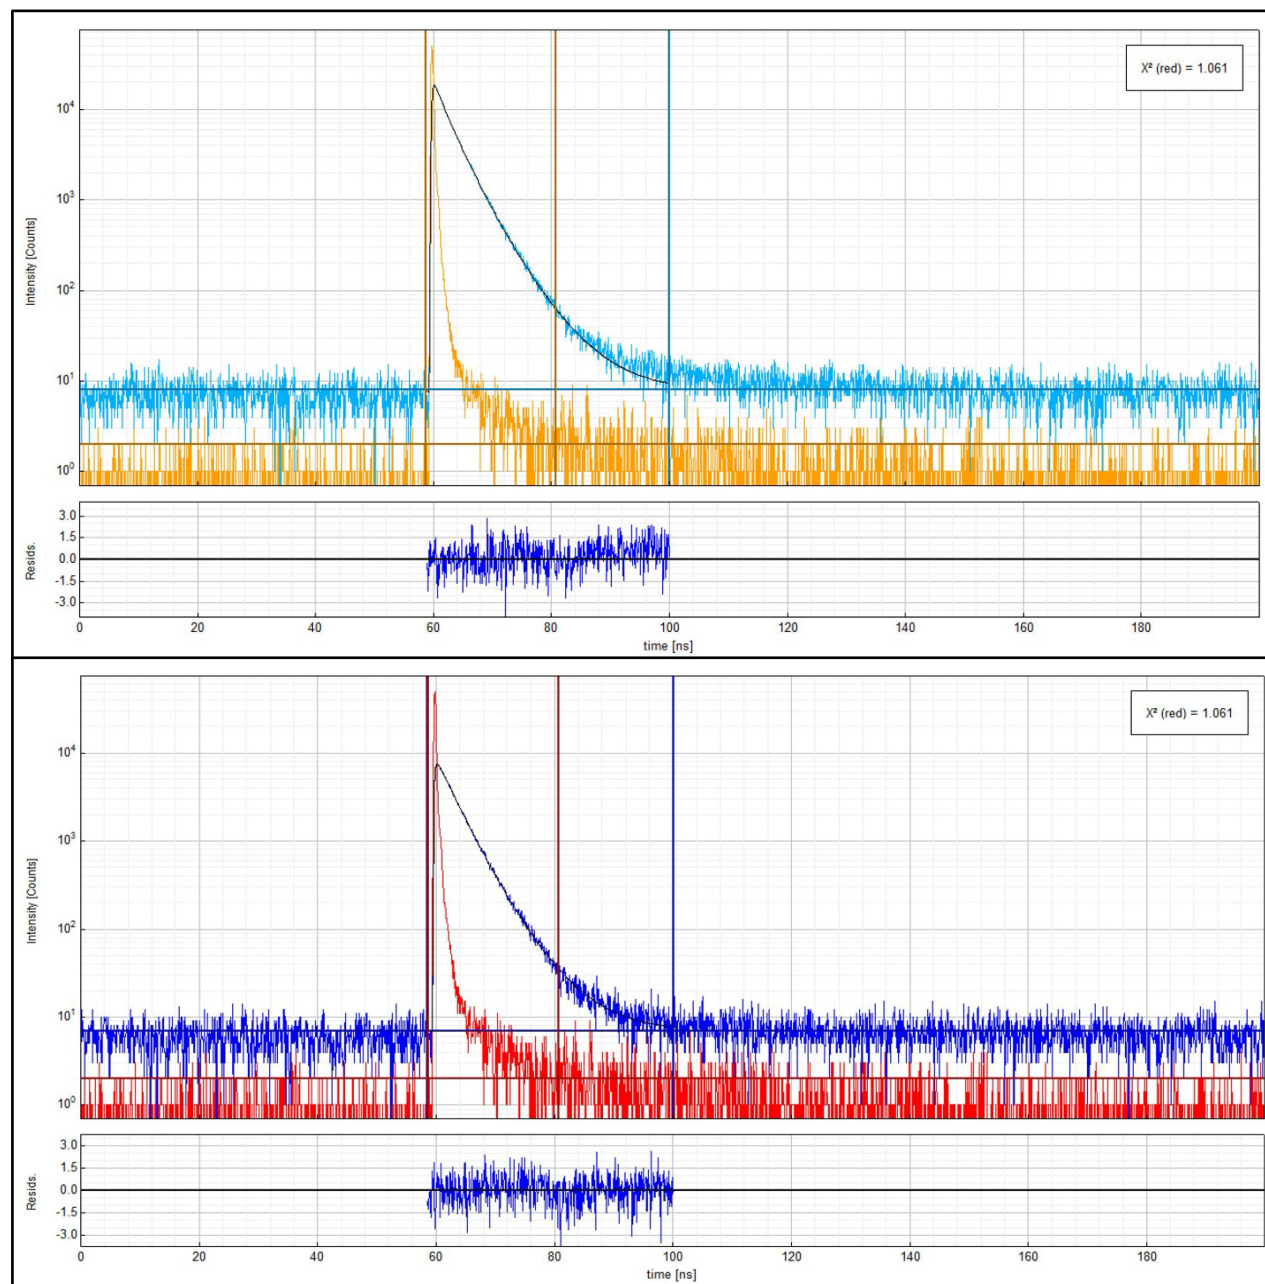

Supplement: s1 [file s1]
