# Supplementary material for: Imipramine Treatment Alters Sphingomyelin, Cholesterol, and Glycerophospholipid Metabolism in Isolated Macrophage Lysosomes
Source: MDPI journal article supplement (doi:10.3390/biom13121732), 2023-12-01
Supplement: s1 [file s1]

**Table S1.** Quantitation of western blot image corresponding to Figure 1. Lysosomes from control cells (C. Lysosomes), lysosomes from imipramine-treated cells (IMP. Lysosomes).

|                     |                | (255 - mean gray value) |                                               |                            | (255 – Background)  | (Inv. gray value – Inv. Background) |
|---------------------|----------------|-------------------------|-----------------------------------------------|----------------------------|---------------------|-------------------------------------|
|                     | Sample         | Mean gray value         | Inverted gray value                           | Background                 | Inverted Background | Net gray value                      |
| LIMP2               | Cell lysates   | 213.160                 | 41.840                                        | 245.967                    | 9.033               | 32.807                              |
|                     | C. Lysosomes   | 83.586                  | 171.414                                       | 244.140                    | 10.860              | 160.554                             |
|                     | IMP. Lysosomes | 113.284                 | 141.716                                       | 245.149                    | 9.851               | 131.865                             |
|                     |                |                         |                                               |                            |                     |                                     |
| Calreticulin (Cal.) | Cell lysates   | 241.141                 | 13.859                                        | 246.319                    | 8.681               | 5.178                               |
|                     | C. Lysosomes   | 244.568                 | 10.432                                        | 246.037                    | 8.963               | 1.469                               |
|                     | IMP. Lysosomes | 245.535                 | 9.465                                         | 246.632                    | 8.368               | 1.097                               |
|                     |                |                         |                                               |                            |                     |                                     |
|                     |                | Net LIMP2/Net Cal.      | (Lysosomes: LIMP2/Cal.) / (Cells: LIMP2/Cal.) | <b>Approx. Fold-purity</b> |                     |                                     |
|                     | Cell lysates   | 6.34                    |                                               |                            |                     |                                     |
|                     | C. Lysosomes   | 109.29                  | 17.25                                         | ~17                        |                     |                                     |
|                     | IMP. Lysosomes | 120.21                  | 18.97                                         | ~19                        |                     |                                     |
